# Supplementary material for: Investigation of the structural, optical, and electrical properties of the (CH3NH3)3(SbCl5)·Cl compound
Source: Royal Society of Chemistry journal article supplement (doi:10.1039/d6ra00964f), 2026-05-14
Supplement: d6ra00964f1.pdf [file d6ra00964f1.pdf]

## Investigation of structural, optical, and electrical conductivity study for (CH<sub>3</sub>NH<sub>3</sub>)<sub>3</sub>(SbCl<sub>5</sub>)Cl compound

N. Chakchouk<sup>1</sup>, H. Khachroum<sup>5</sup>, M. A. Ben Yazeed<sup>2</sup>, A. A. Awhida<sup>3</sup>, M. S. M. Abdelbaky<sup>4,5</sup>,  
S. García Granda<sup>5</sup>, A. Ben Rhaïem<sup>1</sup>

<sup>1</sup>Laboratory LaSCOM, Faculty of sciences of Sfax, University of Sfax, BP1171, 3000, Sfax, Tunisia.

<sup>2</sup>Department of Physics, Faculty of Science, University of Alasmarya Islamic, Zliten, Libya.

<sup>3</sup>Higher Institute of Engineering Technologies Zliten Libya.

<sup>4</sup>Department of Physical Chemistry, Faculty of Chemical Science, University of Salamanca, E-37008, Salamanca, Spain.

<sup>5</sup>Department of Physical and Analytical Chemistry, Oviedo University-CINN, 33006, Oviedo, Spain..

E-mail address: [abdallahrhaïem@yahoo.fr](mailto:abdallahrhaïem@yahoo.fr)

**Table S1.** Anisotropic Displacement Parameters ( $\text{\AA}^2 \times 10^3$ ) for [(CH<sub>3</sub>N)<sub>3</sub>(SbCl<sub>5</sub>)Cl].

| Atom | U <sub>11</sub> | U <sub>22</sub> | U <sub>33</sub> | U <sub>23</sub> | U <sub>13</sub> | U <sub>12</sub> |
|------|-----------------|-----------------|-----------------|-----------------|-----------------|-----------------|
| Sb1  | 0.2543(8)       | 0.2658(9)       | 0.3602(9)       | -0.0353(6)      | 0.0451(6)       | -0.00135(6)     |
| Cl1  | 0.54(4)         | 0.418(3)        | 0.429(4)        | 0.067(3)        | 0.131(3)        | -0.0004(3)      |
| Cl3  | 0.418(3)        | 0.389(3)        | 0.461(4)        | -0.094(3)       | 0.068(3)        | -0.00134(3)     |
| Cl4  | 0.602(4)        | 0.716(5)        | 0.397(4)        | -0.55(3)        | 0.080(3)        | -0.0080(4)      |
| Cl2  | 0.389(3)        | 0.459(4)        | 0.732(5)        | -0.115(3)       | 0.022(3)        | 0.013(3)        |
| N1   | 0.665(17)       | 0.41(13)        | 0.661(17)       | -0.77(11)       | 0.257(13)       | -0.004(11)      |
| N2   | 0.456(12)       | 0.48(12)        | 0.49(14)        | 0.026(10)       | 0.13(10)        | 0.041(10)       |
| N3   | 0.525(15)       | 0.517(14)       | 0.651(17)       | 0.015(12)       | 0.016(13)       | 0.009(11)       |
| C2   | 0.73(2)         | 0.513(18)       | 0.65(2)         | 0.107(15)       | 0.071(18)       | 0.0118(15)      |
| C1   | 0.65(2)         | 0.548(18)       | 0.61(2)         | -0.156(14)      | 0.157(16)       | -0.0019(14)     |
| C4   | 0.61(2)         | 0.111(3)        | 0.58(2)         | -0.01(2)        | 0.037(17)       | 0.09(2)         |
| Cl6  | 0.413(3)        | 0.516(4)        | 0.499(4)        | 0.009(3)        | 0.070(3)        | -0.0038(3)      |
| Cl5  | 0.557(4)        | 0.49(4)         | 0.791(6)        | 0.051(4)        | 0.003(4)        | 0.0178(3)       |

**Table S2.** Fractional Atomic Coordinates ( $\times 10^4$ ) and Equivalent Isotropic Displacement Parameters ( $\text{\AA}^2 \times 10^3$ ) for  $[(\text{CH}_6\text{N})_3(\text{SbCl}_5) \cdot \text{Cl}]$ .  $U_{\text{eq}}$  is defined as 1/3 of the trace of the orthogonalised  $U_{ij}$  tensor.

| Atom | <i>x</i>    | <i>y</i>    | <i>z</i>    | $U(\text{eq})$ |
|------|-------------|-------------|-------------|----------------|
| Sb1  | 0.40447(2)  | 0.33225(2)  | 0.27808(2)  | 0.02925(5)     |
| Cl1  | 0.38507(5)  | 0.28673(8)  | 0.44482(4)  | 0.04584(15)    |
| Cl3  | 0.52337(5)  | 0.56235(7)  | 0.32623(4)  | 0.04213(15)    |
| Cl4  | 0.44388(6)  | 0.40782(10) | 0.11214(5)  | 0.05697(18)    |
| Cl2  | 0.54978(5)  | 0.13059(8)  | 0.2877(5)   | 0.0529(18)     |
| N1   | 0.6428(2)   | 0.3131(3)   | 0.50972(18) | 0.0566(7)      |
| N2   | 0.69391(17) | 0.4488(3)   | 0.18574(15) | 0.0470(5)      |
| N3   | 0.4441(2)   | 0.8179(3)   | 0.15123(18) | 0.0567(6)      |
| C2   | 0.6433(3)   | 0.1453(3)   | 0.5440(2)   | 0.0630(9)      |
| C1   | 0.7401(3)   | 0.3432(3)   | 0.1214(2)   | 0.0597(8)      |
| C4   | 0.4092(3)   | 0.8806(5)   | 0.0633(2)   | 0.0768(10)     |
| Cl6  | 0.81251(5)  | 0.33545(8)  | 0.37015(5)  | 0.04743(16)    |
| Cl5  | 0.75931(6)  | 0.43345(9)  | 0.72255(6)  | 0.0620(2)      |

**Table S3.** Bond length ( $\text{\AA}$ ) and angles ( $^\circ$ ) of compound  $[(\text{CH}_6\text{N})_3(\text{SbCl}_5) \cdot \text{Cl}]$ .

| Bond distances ( $\text{\AA}$ )  | Bond angles ( $^\circ$ )            | Bond angles ( $^\circ$ )             |
|----------------------------------|-------------------------------------|--------------------------------------|
| Sb1–Cl1= 2.5836(7)               | Cl1–Sb1–Cl4= 172.56(2)              | Cl2–Sb1–Cl1= 89.31(3)                |
| Sb1–Cl3=2.4740(6)                | Cl1–Sb1–Cl5 <sup>1</sup> = 87.23(2) | Cl2–Sb1–Cl5 <sup>1</sup> = 176.78(3) |
| Sb1–Cl4= 2.6790(7)               | Cl3–Sb1–Cl1= 86.41(2)               |                                      |
| Sb1–Cl2= 2.4834(6)               | Cl3–Sb1–Cl4= 86.22(2)               |                                      |
| Sb1–Cl5 <sup>1</sup> = 2.4834(6) | Cl3–Sb1–Cl2= 91.19(2)               |                                      |
| N1–C2= 1.445(3)                  | Cl3–Sb1–Cl5 <sup>1</sup> = 87.26(2) |                                      |
| N2–C1= 1.464(3)                  | Cl4–Sb1–Cl5 <sup>1</sup> = 93.40(3) |                                      |
| N3–C4= 1.452(4)                  | Cl2–Sb1–Cl1= 89.86(2)               |                                      |
